# Supplementary material
Source: PubMed Central journal article supplement (PMC5850492)
Supplement: dex304suppl_table1.pdf [file dex304suppl_table1.pdf]

**Supplementary Table S1** Age-adjusted and multivariable hazard ratios of early menopause by body mass index (BMI) in 1989 and updated biennially during follow-up, Nurses' Health Study II, 1989–2011<sup>a</sup>.

| Adiposity measure                 | Cases | Person-years | Age-adjusted model |            | Multivariable-adjusted Model 1 <sup>b</sup> |            | Multivariable-adjusted Model 2 <sup>c</sup> |            |  |
|-----------------------------------|-------|--------------|--------------------|------------|---------------------------------------------|------------|---------------------------------------------|------------|--|
|                                   |       |              | HR                 | 95% CI     | HR                                          | 95% CI     | HR                                          | 95% CI     |  |
| BMI, 1989 (kg/m <sup>2</sup> )    |       |              |                    |            |                                             |            |                                             |            |  |
| <18.5                             | 125   | 54 958       | 1.31               | 1.08, 1.57 | 1.30                                        | 1.08, 1.56 | 1.29                                        | 1.07, 1.56 |  |
| 18.5–22.4                         | 1299  | 699 143      | ref                |            | ref                                         |            | ref                                         |            |  |
| 22.5–24.9                         | 631   | 335 081      | 0.97               | 0.88, 1.07 | 0.95                                        | 0.86, 1.04 | 0.94                                        | 0.85, 1.03 |  |
| 25.0–27.4                         | 298   | 181 909      | 0.82               | 0.72, 0.93 | 0.79                                        | 0.70, 0.90 | 0.77                                        | 0.68, 0.88 |  |
| 27.5–29.9                         | 122   | 82 625       | 0.73               | 0.61, 0.88 | 0.70                                        | 0.58, 0.85 | 0.67                                        | 0.55, 0.81 |  |
| 30.0–34.9                         | 172   | 94 425       | 0.88               | 0.75, 1.04 | 0.85                                        | 0.72, 1.00 | 0.79                                        | 0.67, 0.93 |  |
| ≥35.0                             | 137   | 58 328       | 1.11               | 0.93, 1.32 | 1.06                                        | 0.89, 1.27 | 0.95                                        | 0.79, 1.14 |  |
| BMI, updated (kg/m <sup>2</sup> ) |       |              |                    |            |                                             |            |                                             |            |  |
| <18.5                             | 73    | 30 303       | 1.37               | 1.08, 1.74 | 1.35                                        | 1.06, 1.72 | 1.34                                        | 1.06, 1.71 |  |
| 18.5–22.4                         | 981   | 505 273      | ref                |            | ref                                         |            | ref                                         |            |  |
| 22.5–24.9                         | 682   | 341 036      | 1.02               | 0.93, 1.13 | 1.00                                        | 0.91, 1.10 | 0.99                                        | 0.90, 1.10 |  |
| 25.0–27.4                         | 384   | 232 668      | 0.86               | 0.76, 0.97 | 0.83                                        | 0.74, 0.94 | 0.82                                        | 0.72, 0.92 |  |
| 27.5–29.9                         | 191   | 127 726      | 0.80               | 0.69, 0.94 | 0.77                                        | 0.66, 0.90 | 0.75                                        | 0.64, 0.87 |  |
| 30.0–34.9                         | 249   | 158 037      | 0.83               | 0.72, 0.96 | 0.80                                        | 0.69, 0.92 | 0.76                                        | 0.66, 0.87 |  |
| ≥35.0                             | 236   | 117 255      | 1.06               | 0.92, 1.22 | 1.01                                        | 0.87, 1.16 | 0.91                                        | 0.78, 1.05 |  |

<sup>a</sup>BMI information in 1989; *n* = 78 360.<sup>b</sup>Adjusted for age at baseline (continuous), race/ethnicity (non-Hispanic White, Asian, Other), physical activity (<3, 3–49, >49 MET\*h/week), pack-years cigarette smoking (0, 1–10, 10–15, >15 pack-years), alcohol consumption (0, 0–10, 10–30, ≥30 g of alcohol).<sup>c</sup>Model 1 additionally adjusted for reproductive factors: oral contraceptive use and duration (nonuser, 1–71, ≥72 months), parity (0, 1–2, ≥3 births), age at menarche (<10, 10, 11, 12, 13, 14, 15, 16, ≥17 years of age), breastfeeding status and duration (0–1, 1–3, 3–6, ≥6 months).
