# Supplementary material
Source: PubMed Central journal article supplement (PMC5850492)
Supplement: dex304suppl_table2.pdf [file dex304suppl_table2.pdf]

**Supplementary Table SII** Age-adjusted and multivariable odds ratios of early menopause by waist circumference and waist-to-hip ratio adjusting for BMI in 1993, Nurses' Health Study II, 1989–2011<sup>a</sup>.

| Adiposity measure         | Multivariable-adjusted model <sup>b</sup> |            |
|---------------------------|-------------------------------------------|------------|
|                           | OR                                        | 95% CI     |
| Waist circumference, 1993 |                                           |            |
| <28.0                     | ref                                       |            |
| 28.0–<30.0                | 0.92                                      | 0.77, 1.11 |
| 30.0–<32.0                | 0.89                                      | 0.71, 1.10 |
| 32.0–<36.0                | 0.80                                      | 0.63, 1.03 |
| ≥36.0                     | 0.97                                      | 0.70, 1.34 |
| Waist-hip ratio, 1993     |                                           |            |
| <0.75                     | ref                                       |            |
| 0.75–<0.80                | 0.89                                      | 0.76, 1.05 |
| 0.80–<0.85                | 0.84                                      | 0.70, 1.02 |
| 0.85–<0.90                | 0.72                                      | 0.56, 0.94 |
| ≥0.90                     | 0.98                                      | 0.75, 1.30 |

<sup>a</sup>Waist circumference  $n = 34\,499$ ; waist-to-hip ratio  $n = 34\,349$ .

<sup>b</sup>Adjusted for age, race/ethnicity, physical activity, pack-years cigarette smoking, alcohol consumption, oral contraceptive use, parity, age at menarche, breastfeeding and BMI in 1993. See Table II footnote for categorization of covariates.
