# Supplementary material
Source: PubMed Central journal article supplement (PMC5850492)
Supplement: dex304suppl_table3.pdf [file dex304suppl_table3.pdf]

**Supplementary Table SIII Age-adjusted and multivariable odds ratios of early menopause by BMI at ages 18 and 35 and weight change between ages 18 and 35 mutually adjusted for BMI, Nurses' Health Study II, 1989–2011<sup>a</sup>.**

|                                    | Multivariable Model 2 <sup>b</sup> |            |
|------------------------------------|------------------------------------|------------|
|                                    | OR                                 | 95% CI     |
| BMI at age 18 (kg/m <sup>2</sup> ) |                                    |            |
| <17.5                              | 1.37                               | 1.09, 1.72 |
| 17.5–18.4                          | 0.87                               | 0.70, 1.08 |
| 18.5–22.4                          | ref                                |            |
| 22.5–24.9                          | 0.87                               | 0.73, 1.05 |
| 25.0–27.4                          | 1.08                               | 0.83, 1.40 |
| 27.5–29.9                          | 1.03                               | 0.68, 1.57 |
| 30.0–34.9                          | 1.04                               | 0.67, 1.61 |
| ≥35.0                              | 1.24                               | 0.68, 2.27 |
| BMI at age 35 (kg/m <sup>2</sup> ) |                                    |            |
| <18.5                              | 1.45                               | 1.09, 1.93 |
| 18.5–22.4                          | ref                                |            |
| 22.5–24.9                          | 0.92                               | 0.78, 1.07 |
| 25.0–27.4                          | 0.97                               | 0.80, 1.16 |
| 27.5–29.9                          | 0.73                               | 0.55, 0.96 |
| 30.0–34.9                          | 1.03                               | 0.80, 1.31 |
| ≥35.0                              | 1.11                               | 0.82, 1.51 |
| Weight change 18–35 (lbs.)         |                                    |            |
| lost ≥ 20.0 lbs.                   | 1.45                               | 0.98, 2.14 |
| lost 5.0–19.9 lbs.                 | 1.12                               | 0.89, 1.40 |
| lost <5 or gained up to 5.0 lbs.   | 1.07                               | 0.90, 1.27 |
| gained 5.1–15.0 lbs.               | ref                                |            |
| gained 15.1–25 lbs.                | 0.95                               | 0.80, 1.14 |
| gained 25.1–50 lbs.                | 0.96                               | 0.81, 1.14 |
| gained > 50 lbs.                   | 1.13                               | 0.91, 1.42 |

<sup>a</sup>Total  $n = 35\ 359$ ; among women who had menopause  $\geq$  age 35, and available information on BMI at age 18 and 35.

<sup>b</sup>BMI at age 18 adjusted for BMI at age 35, age at baseline, race/ethnicity, physical activity in 1989, pack-years cigarette smoking in 1989, alcohol consumption 1989; age at menarche, total duration of oral contraceptive use in 1989, parity in 1989 and breastfeeding in 1989.

BMI at age 35 and weight change adjusted for BMI at age 18, age at baseline, race/ethnicity, physical activity in 1989, pack-years cigarette smoking in 1989 (pack-years at age 35 for age 35 BMI), alcohol consumption 1989, age at menarche, duration of oral contraceptive use at age 35, parity at age 35 and breastfeeding in 1989. See Table II footnote for categorization of covariates.
