# Supplementary material
Source: PubMed Central journal article supplement (PMC5850492)
Supplement: dex304suppl_table4.pdf [file dex304suppl_table4.pdf]

**Supplementary Table SIV** Age-adjusted and multivariable odds ratios of early menopause by BMI in 1989 excluding women who used hormone therapy prior to menopause and before age 45, Nurses' Health Study II, 1989–2011<sup>a</sup>.

| Adiposity measure              | Total | Cases | Age-adjusted model |            | Multivariable-adjusted model <sup>b</sup> |            |
|--------------------------------|-------|-------|--------------------|------------|-------------------------------------------|------------|
|                                |       |       | OR                 | 95% CI     | OR                                        | 95% CI     |
| BMI, 1989 (kg/m <sup>2</sup> ) |       |       |                    |            |                                           |            |
| <18.5                          | 2199  | 94    | 1.27               | 1.03, 1.58 | 1.29                                      | 1.04, 1.60 |
| 18.5–22.4                      | 30112 | 1012  | Ref                |            | ref                                       |            |
| 22.5–24.9                      | 15077 | 498   | 0.99               | 0.89, 1.10 | 0.94                                      | 0.84, 1.05 |
| 25.0–27.4                      | 8249  | 230   | 0.83               | 0.72, 0.96 | 0.77                                      | 0.67, 0.90 |
| 27.5–29.9                      | 3725  | 92    | 0.74               | 0.59, 0.92 | 0.67                                      | 0.54, 0.83 |
| 30.0–34.9                      | 4232  | 131   | 0.93               | 0.77, 1.12 | 0.83                                      | 0.69, 1.00 |
| ≥35.0                          | 2500  | 94    | 1.14               | 0.92, 1.41 | 0.97                                      | 0.78, 1.21 |

<sup>a</sup>n = 66 094.

<sup>b</sup>Adjusted for age, race/ethnicity, physical activity, pack-years cigarette smoking, alcohol consumption, oral contraceptive use, parity, age at menarche and breastfeeding. See Table II footnote for categorization of covariates.
