# Supplementary material
Source: PubMed Central journal article supplement (PMC5850492)
Supplement: dex304suppl_table5.pdf [file dex304suppl_table5.pdf]

**Supplementary Table SV** Age-adjusted and multivariable odds ratios of early menopause by BMI in 1989 excluding women who had menopause between ages 45–47, Nurses' Health Study II, 1989–2011<sup>a</sup>.

| Adiposity measure              | Total  | Cases | Age-adjusted model |            | Multivariable-adjusted model <sup>b</sup> |            |
|--------------------------------|--------|-------|--------------------|------------|-------------------------------------------|------------|
|                                |        |       | OR                 | 95% CI     | OR                                        | 95% CI     |
| BMI, 1989 (kg/m <sup>2</sup> ) |        |       |                    |            |                                           |            |
| <18.5                          | 2301   | 125   | 1.31               | 1.08, 1.58 | 1.32                                      | 1.09, 1.59 |
| 18.5–22.4                      | 31 049 | 1299  | ref                |            | ref                                       |            |
| 22.5–24.9                      | 15 273 | 631   | 0.99               | 0.90, 1.09 | 0.95                                      | 0.86, 1.05 |
| 25.0–27.4                      | 8426   | 298   | 0.85               | 0.75, 0.96 | 0.79                                      | 0.69, 0.90 |
| 27.5–29.9                      | 3755   | 122   | 0.78               | 0.64, 0.94 | 0.71                                      | 0.59, 0.86 |
| 30.0–34.9                      | 4447   | 172   | 0.93               | 0.79, 1.10 | 0.83                                      | 0.70, 0.98 |
| ≥35.0                          | 2761   | 137   | 1.21               | 1.01, 1.45 | 1.03                                      | 0.85, 1.24 |

<sup>a</sup>n = 68 012.

<sup>b</sup>Adjusted for age, race/ethnicity, physical activity, pack-years cigarette smoking, alcohol consumption, oral contraceptive use, parity, age at menarche and breastfeeding. See Table II footnote for categorization of covariates.
