# Supplementary material
Source: PubMed Central journal article supplement (PMC5850492)
Supplement: dex304suppl_table6.pdf [file dex304suppl_table6.pdf]

**Supplementary Table SVI** Age-adjusted and multivariable odds ratios of early menopause by BMI in 1989 excluding women who had ulcerative colitis, Crohn's disease, rheumatoid arthritis or systemic lupus before age 45, Nurses' Health Study II, 1989–2011<sup>a</sup>.

| Adiposity measure              | Total  | Cases | Age-adjusted model |            | Multivariable-adjusted model <sup>b</sup> |            |
|--------------------------------|--------|-------|--------------------|------------|-------------------------------------------|------------|
|                                |        |       | OR                 | 95% CI     | OR                                        | 95% CI     |
| BMI, 1989 (kg/m <sup>2</sup> ) |        |       |                    |            |                                           |            |
| <18.5                          | 2546   | 117   | 1.29               | 1.06, 1.57 | 1.30                                      | 1.07, 1.58 |
| 18.5–22.4                      | 34 454 | 1233  | ref                |            | ref                                       |            |
| 22.5–24.9                      | 17 007 | 596   | 0.98               | 0.89, 1.09 | 0.94                                      | 0.85, 1.04 |
| 25.0–27.4                      | 9402   | 288   | 0.86               | 0.75, 0.98 | 0.80                                      | 0.70, 0.92 |
| 27.5–29.9                      | 4236   | 112   | 0.74               | 0.61, 0.90 | 0.68                                      | 0.56, 0.83 |
| 30.0–34.9                      | 4937   | 162   | 0.92               | 0.78, 1.09 | 0.83                                      | 0.70, 0.99 |
| ≥35.0                          | 3073   | 129   | 1.19               | 0.99, 1.44 | 1.03                                      | 0.85, 1.25 |

<sup>a</sup>n = 75 655.

<sup>b</sup>Adjusted for age, race/ethnicity, physical activity, pack-years cigarette smoking, alcohol consumption, oral contraceptive use, parity, age at menarche and breastfeeding. See Table II footnote for categorization of covariates.
